# Supplementary material for: Metformin in pregnancy and risk of adverse long-term outcomes: a register-based cohort study
Source: PubMed Central journal article supplement — BMJ Open Diabetes Res Care. 2022 Jan 5;10(1):e002363. doi: 10.1136/bmjdrc-2021-002363 (PMC8734020; doi:10.1136/bmjdrc-2021-002363), 2022-01-05
Supplement: bmjdrc-2021-002363supp001.pdf [file bmjdrc-2021-002363supp001.pdf]

## Supplementary files

## Contents

|                                                                                                                                                                                                                                                                                                            |                                     |
|------------------------------------------------------------------------------------------------------------------------------------------------------------------------------------------------------------------------------------------------------------------------------------------------------------|-------------------------------------|
| Supplemental Figure S1. Selection of study population and the number of children in each exposure group during the study periods 1996-2016 and 2004-2016. Only the 2004-2016 study period is reported in this paper. ....                                                                                  | 2                                   |
| Supplemental Table S1. Definitions of exclusion criteria .....                                                                                                                                                                                                                                             | 3                                   |
| Supplemental Table S2. ATC codes for the study drugs.....                                                                                                                                                                                                                                                  | 5                                   |
| Supplemental Table S3. Definitions of primary and secondary outcomes .....                                                                                                                                                                                                                                 | 6                                   |
| Supplemental Table S4. Definitions of covariates (maternal diagnoses) .....                                                                                                                                                                                                                                | 20                                  |
| Supplemental Methods 1. Description of the subcohort for maternal gestational diabetes.....                                                                                                                                                                                                                | 21                                  |
| Supplemental Methods 2. Calculation of incidence rates.....                                                                                                                                                                                                                                                | <b>Error! Bookmark not defined.</b> |
| Supplemental Table S5. Baseline characteristics of children exposed to metformin, combination treatment, and insulin in the subcohort for maternal gestational diabetes.....                                                                                                                               | 23                                  |
| Supplemental Table S6. Association between exposure to metformin in pregnancy (compared to exposure to only insulin) and risk of obesity, hypoglycaemia, hyperglycaemia, diabetes, hypertension, PCOS, and challenges in motor-social development in the subcohort for maternal gestational diabetes ..... | 28                                  |
| Supplemental Table S7. Association between exposure to metformin in pregnancy and risk of obesity, hypoglycaemia, hyperglycaemia, diabetes, hypertension, PCOS, and challenges in motor-social development, requiring a least two prescriptions of the study drugs.....                                    | 29                                  |

**Supplemental Figure S1. Selection of study population and the number of children in each exposure group during the study periods 1996-2016 and 2004-2016. Only the 2004-2016 study period is reported in this paper.**

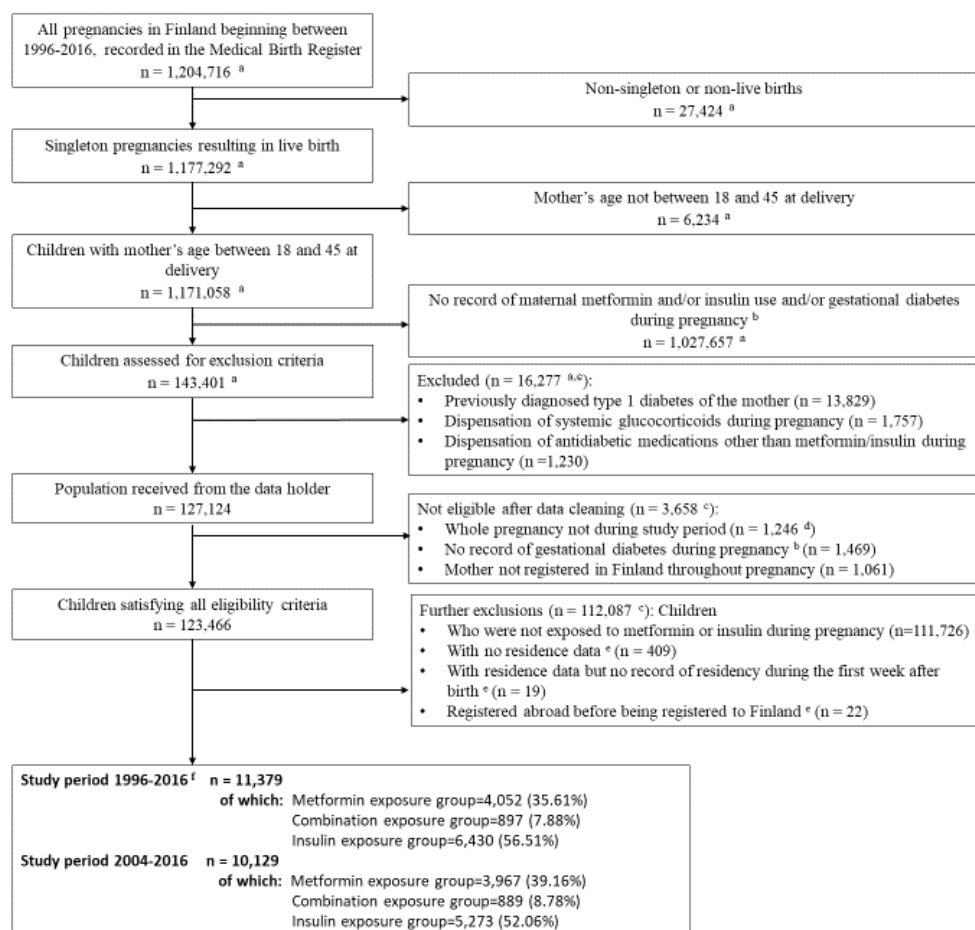

<sup>a</sup> Number reported by the data holder.

<sup>b</sup> Defined as one of the following: dispensation of metformin/insulin during pregnancy, or a diagnosis of gestational diabetes, or a pathological oral glucose tolerance test.

<sup>c</sup> The sub-categories overlap, thus this number is not the sum of numbers in sub-categories.

<sup>d</sup> The first day of last menstrual period had to be recorded during the study inclusion period.

<sup>e</sup> Migration abroad triggered end of follow-up. Children not registered as residing in Finland were thus excluded.

<sup>f</sup> The protocol describes two study periods, 1996-2016 and 2004-2016, which was originally intended. However, given the observation of very limited maternal pregnancy exposure to metformin in Finland before 2004, results are presented only for 2004-2016.

**Metformin in pregnancy and risk of adverse long-term outcomes: register-based cohort study**  
Supplementary file

**Supplemental Table S1. Definitions of exclusion criteria**

| Exclusion criteria                                                                        | Definition                                                                                                           |                                               |                                                                            |                                                                                                                                                                       |
|-------------------------------------------------------------------------------------------|----------------------------------------------------------------------------------------------------------------------|-----------------------------------------------|----------------------------------------------------------------------------|-----------------------------------------------------------------------------------------------------------------------------------------------------------------------|
|                                                                                           | Time frame for the criteria                                                                                          | Data source                                   | Code                                                                       | Description of the code                                                                                                                                               |
| Previously diagnosed or post-partum Type 1 diabetes                                       | After delivery                                                                                                       | HILMO and AvoHILMO (ICD-10 code, ICPC-2 code) | ICD-10: E10, O24.0<br>ICPC-2: T89                                          | Type 1 diabetes mellitus                                                                                                                                              |
| Dispensation of systemic glucocorticoids during pregnancy                                 | During pregnancy, i.e. on the first day of the last menstrual period or any time after it until the date of delivery | The Prescription Register (ATC code)          | H02AB                                                                      | Glucocorticoids                                                                                                                                                       |
| Dispensation of antidiabetic medications other than metformin or insulin during pregnancy | During pregnancy, i.e. on the first day of the LMP or any time after it until the date of delivery                   | The Prescription Register (ATC code)          | A10BA<br>(Except for A10BA02)<br>A10BB<br>A10BC<br>A10BD<br>A10BF<br>A10BG | Biguanides<br>Sulfonylureas<br>Sulfonamides (heterocyclic)<br>Combinations of oral blood glucose lowering drugs<br>Alpha glucosidase inhibitors<br>Thiazolidinediones |

**Metformin in pregnancy and risk of adverse long-term outcomes: register-based cohort study**  
Supplementary file

---

|       |                                                       |
|-------|-------------------------------------------------------|
| A10BH | Dipeptidyl peptidase 4 (DPP-4)<br>inhibitors          |
| A10BJ | Glucagon-like peptide-1 (GLP-<br>1) analogues         |
| A10BK | Sodium-glucose co-transporter 2<br>(SGLT2) inhibitors |
| A10BX | Other blood glucose lowering<br>drugs, excl. insulins |
| A10XA | Aldose reductase inhibitors                           |

---

Abbreviations: ATC, Anatomical Therapeutic Chemical; AvoHILMO, the Register of Primary Health Care Visits; HILMO, the Care Register for Health Care; ICD-10, International Statistical Classification of Diseases and Related Health Problems, Tenth Revision; ICPC-2, International Classification of Primary Care, 2nd revision.

---

**Metformin in pregnancy and risk of adverse long-term outcomes: register-based cohort study**  
Supplementary file

**Supplemental Table S2. ATC codes for the study drugs**

| <b>Medication</b> | <b>ATC (code)</b> | <b>ATC (text)</b>      |
|-------------------|-------------------|------------------------|
| Metformin         | A10BA02           | Metformin              |
| Insulins          | A10A              | Insulins and analogues |

Abbreviations: ATC, Anatomical Therapeutic Chemical

---

**Metformin in pregnancy and risk of adverse long-term outcomes: register-based cohort study**

Supplementary file

**Supplemental Table S3. Definitions of primary and secondary outcomes**

| Outcome                                                                                                                                        | Outcome (definition)                                                                                                                                                                                                                                                                               | ICD-10              | ICD-10 (description)                           | ICD-9 <sup>a</sup> | ICPC-2 | ICPC-2 (description) |
|------------------------------------------------------------------------------------------------------------------------------------------------|----------------------------------------------------------------------------------------------------------------------------------------------------------------------------------------------------------------------------------------------------------------------------------------------------|---------------------|------------------------------------------------|--------------------|--------|----------------------|
| <b>Primary (binary) outcomes - Long-term diagnoses:</b>                                                                                        |                                                                                                                                                                                                                                                                                                    |                     |                                                |                    |        |                      |
| Data collection from age one week until the date of the first occurring event of death, emigration, or end of study period (December 31, 2016) |                                                                                                                                                                                                                                                                                                    |                     |                                                |                    |        |                      |
| Obesity                                                                                                                                        | At least one record of a diagnosis code for obesity in HILMO or AvoHILMO, or BMI (kg/m <sup>2</sup> ) recorded in AvoHILMO above the threshold for obesity according to the Finnish growth references considering the sex and age of the child <sup>b</sup> (BMI available only from 2011 onwards) | E66                 | Obesity                                        | -                  | T82    | Obesity              |
|                                                                                                                                                |                                                                                                                                                                                                                                                                                                    |                     |                                                |                    | T83    | Overweight           |
| Hypoglycaemia                                                                                                                                  | At least one record of a diagnosis code for hypoglycaemia in HILMO or AvoHILMO, or plasma glucose < 2.9 mmol/l as recorded in the regional laboratory databases                                                                                                                                    | E16.1               | Other hypoglycaemia                            | -                  | T87    | Hypoglycaemia        |
|                                                                                                                                                |                                                                                                                                                                                                                                                                                                    | E16.10 <sup>c</sup> | Hyperinsulinism                                | -                  |        |                      |
|                                                                                                                                                |                                                                                                                                                                                                                                                                                                    | E16.11 <sup>c</sup> | Hyperinsulinism NOS                            | -                  |        |                      |
|                                                                                                                                                |                                                                                                                                                                                                                                                                                                    | E16.17 <sup>c</sup> | Functional non-hyperinsulinaemic hypoglycaemia | -                  |        |                      |

**Metformin in pregnancy and risk of adverse long-term outcomes: register-based cohort study**

Supplementary file

| Outcome        | Outcome (definition)                                                                                                                                                  | ICD-10              | ICD-10 (description)                                   | ICD-9 <sup>a</sup> | ICPC-2 | ICPC-2 (description) |
|----------------|-----------------------------------------------------------------------------------------------------------------------------------------------------------------------|---------------------|--------------------------------------------------------|--------------------|--------|----------------------|
|                |                                                                                                                                                                       | E16.19 <sup>c</sup> | Other specified hypoglycaemia                          | -                  |        |                      |
|                |                                                                                                                                                                       | E16.2               | Hypoglycaemia, unspecified                             | -                  | T87    | Hypoglycaemia        |
|                |                                                                                                                                                                       | P70.0               | Syndrome of infant of mother with gestational diabetes | -                  | -      | -                    |
|                |                                                                                                                                                                       | P70.1               | Syndrome of infant of a diabetic mother                | -                  | -      | -                    |
|                |                                                                                                                                                                       | P70.3               | Iatrogenic neonatal hypoglycaemia                      | -                  | -      | -                    |
|                |                                                                                                                                                                       | P70.4               | Other neonatal hypoglycaemia                           | -                  | -      | -                    |
| Hyperglycaemia | At least one record of a diagnosis code for hyperglycaemia in HILMO or AvoHILMO, or fasting plasma glucose $\geq 7.0$ mmol/l, or 2h plasma glucose during OGTT $\geq$ | R73                 | Elevated blood glucose level                           | -                  | -      | -                    |

**Metformin in pregnancy and risk of adverse long-term outcomes: register-based cohort study**

Supplementary file

| Outcome                            | Outcome (definition)                                                                                                                              | ICD-10         | ICD-10 (description)       | ICD-9 <sup>a</sup> | ICPC-2 | ICPC-2 (description)           |
|------------------------------------|---------------------------------------------------------------------------------------------------------------------------------------------------|----------------|----------------------------|--------------------|--------|--------------------------------|
|                                    | 11.1 mmol/l, or HbA1c $\geq$ 48 mmol/mol (or $\geq$ 6.5%), or plasma glucose $\geq$ 11.1 mmol/l, as recorded in the regional laboratory databases |                |                            |                    |        |                                |
| Hypertension                       | At least one record of a diagnosis code for hypertension in HILMO or AvoHILMO                                                                     | I10-I15        | Hypertensive diseases      |                    | K86    | Hypertension uncomplicated     |
|                                    |                                                                                                                                                   |                |                            | -                  | K87    | Hypertension complicated       |
|                                    |                                                                                                                                                   | P29.2          | Neonatal hypertension      | -                  | -      | -                              |
| Diabetes mellitus                  | At least one record of a diagnosis code for any diabetes, including type 1 diabetes mellitus or type 2 diabetes mellitus, in HILMO or AvoHILMO    | E10-E14        | Diabetes Mellitus          |                    | F83    | Retinopathy                    |
|                                    |                                                                                                                                                   |                |                            | -                  | T89    | Diabetes insulin dependent     |
|                                    |                                                                                                                                                   |                |                            | -                  | T90    | Diabetes non-insulin dependent |
|                                    |                                                                                                                                                   | P70.2          | Neonatal diabetes mellitus | -                  | -      | -                              |
| Subcategories of diabetes mellitus |                                                                                                                                                   | E10, O24.0     | Type 1 diabetes mellitus   | -                  | T89    | Diabetes insulin dependent     |
|                                    |                                                                                                                                                   | E11, O24.1     | Type 2 diabetes mellitus   | -                  | T90    | Diabetes non-insulin dependent |
|                                    |                                                                                                                                                   | E12-E14, P70.2 | Other diabetes             | -                  | F83    | Retinopathy                    |
|                                    |                                                                                                                                                   |                |                            |                    |        |                                |

### Metformin in pregnancy and risk of adverse long-term outcomes: register-based cohort study

Supplementary file



| Outcome                                                     | Outcome (definition)                                                                                    | ICD-10 | ICD-10 (description)                                                                     | ICD-9 <sup>a</sup> | ICPC-2 | ICPC-2 (description)                             |
|-------------------------------------------------------------|---------------------------------------------------------------------------------------------------------|--------|------------------------------------------------------------------------------------------|--------------------|--------|--------------------------------------------------|
| PCOS                                                        | At least one record of a diagnosis code for PCOS in HILMO or AvoHILMO                                   | E28.2  | Polycystic ovarian syndrome                                                              | -                  | T99    | Endocrine/metabolic/nutritional disease<br>other |
| Diagnoses related to challenges in motor-social development | At least one record of a diagnosis code for challenges in motor-social development in HILMO or AvoHILMO | F80    | Specific developmental disorders of speech and language                                  | -                  | P24    | Specific learning problem                        |
|                                                             |                                                                                                         | -      | -                                                                                        | -                  | P99    | Psychological disorders, other                   |
|                                                             |                                                                                                         | F81    | Specific developmental disorders of scholastic skills                                    | -                  | P24    | Specific learning problem                        |
|                                                             |                                                                                                         | F82    | Specific developmental disorder of motor function                                        | -                  | P24    | Specific learning problem                        |
|                                                             |                                                                                                         | F83    | Mixed specific developmental disorders - meeting the criteria for two or more of F80-F82 | -                  | P24    | Specific learning problem                        |
|                                                             |                                                                                                         | F84    | Pervasive developmental disorders (includes Autism)                                      | -                  | P99    | Psychological disorders, other                   |
|                                                             |                                                                                                         | F88    | Other disorders of                                                                       | -                  | P99    | Psychological disorders, other                   |

**Metformin in pregnancy and risk of adverse long-term outcomes: register-based cohort study**

Supplementary file

| Outcome | Outcome (definition) | ICD-10 | ICD-10 (description)                                                                                | ICD-9 <sup>a</sup> | ICPC-2 | ICPC-2 (description)                  |
|---------|----------------------|--------|-----------------------------------------------------------------------------------------------------|--------------------|--------|---------------------------------------|
|         |                      |        | psychological development                                                                           |                    |        |                                       |
|         |                      | F89    | Unspecified disorder of psychological development                                                   | -                  | P99    | Psychological disorders, other        |
|         |                      | F90    | Hyperkinetic disorders                                                                              | -                  | P81    | Hyperkinetic disorder                 |
|         |                      | F91    | Conduct disorders                                                                                   | -                  | P22    | Child behaviour symptom/complaint     |
|         |                      | F92    | Mixed disorders of conduct and emotions                                                             | -                  | P22    | Child behaviour symptom/complaint     |
|         |                      | F93    | Emotional disorders with onset specific to childhood                                                | -                  | P22    | Child behaviour symptom/complaint     |
|         |                      | F94    | Disorders of social functioning with onset specific to childhood and adolescence                    | -                  | P22    | Child behaviour symptom/complaint     |
|         |                      | F95    | Tic disorders                                                                                       | -                  | P10    | Stammering/stuttering/tic             |
|         |                      | F98    | Other behavioural and emotional disorders with onset usually occurring in childhood and adolescence | -                  | P10    | Stammering/stuttering/tic             |
|         |                      |        |                                                                                                     | -                  | P11    | Eating problem in child               |
|         |                      |        |                                                                                                     | -                  | P12    | Bedwetting/enuresis                   |
|         |                      |        |                                                                                                     | -                  | P13    | Encopresis/bowel training problem     |
|         |                      |        |                                                                                                     | -                  | P29    | Psychological symptom/complaint other |

**Metformin in pregnancy and risk of adverse long-term outcomes: register-based cohort study**

Supplementary file

| Outcome                                                                       | Outcome (definition) | ICD-10  | ICD-10 (description)                                                                          | ICD-9 <sup>a</sup> | ICPC-2 | ICPC-2 (description)                  |
|-------------------------------------------------------------------------------|----------------------|---------|-----------------------------------------------------------------------------------------------|--------------------|--------|---------------------------------------|
|                                                                               |                      |         |                                                                                               | -                  | P28    | Limited function/disability           |
|                                                                               |                      |         |                                                                                               | -                  | P85    | Mental retardation                    |
| Sub-categories of diagnoses related to challenges in motor-social development |                      | F80-F89 | Disorders of psychological development                                                        | -                  | -      | -                                     |
|                                                                               |                      | F80-F83 | Learning disabilities and abnormalities in motor development                                  | -                  | P24    | Specific learning problem             |
|                                                                               |                      | F84     | Autism spectrum disorders                                                                     | -                  | -      | -                                     |
|                                                                               |                      | F90-F98 | Behavioural and emotional disorders with onset usually occurring in childhood and adolescence | -                  | P10    | Stammering/stuttering/tic             |
|                                                                               |                      |         |                                                                                               | -                  | P11    | Eating problem in child               |
|                                                                               |                      |         |                                                                                               | -                  | P12    | Bedwetting/enuresis                   |
|                                                                               |                      |         |                                                                                               | -                  | P13    | Encopresis/bowel training problem     |
|                                                                               |                      |         |                                                                                               | -                  | P22    | Child behaviour symptom/complaint     |
|                                                                               |                      |         |                                                                                               | -                  | P29    | Psychological symptom/complaint other |
|                                                                               |                      |         |                                                                                               | -                  | P81    | Hyperkinetic disorder                 |
|                                                                               |                      | F90     | Hyperkinetic disorders                                                                        | -                  | P81    | Hyperkinetic disorder                 |
|                                                                               |                      | F91-F94 | Conductive disorders                                                                          | -                  | P22    | Child behaviour symptom/complaint     |

### Metformin in pregnancy and risk of adverse long-term outcomes: register-based cohort study

Supplementary file

| Outcome                                                                  | Outcome (definition)                                                                                   | ICD-10    | ICD-10 (description)                                                      | ICD-9 <sup>a</sup>          | ICPC-2 | ICPC-2 (description) |
|--------------------------------------------------------------------------|--------------------------------------------------------------------------------------------------------|-----------|---------------------------------------------------------------------------|-----------------------------|--------|----------------------|
| <b>Secondary (binary and continuous) outcomes A - Immediate effects:</b> |                                                                                                        |           |                                                                           |                             |        |                      |
| Data collection at birth up to 1 year (maximum follow-up one year)       |                                                                                                        |           |                                                                           |                             |        |                      |
| Major congenital anomalies <sup>d</sup>                                  | Major congenital anomalies recorded in the Register of Congenital Malformations by the age of one year | See below | Major congenital anomalies - structural anomalies                         | See below                   | -      | -                    |
|                                                                          |                                                                                                        | See below | Major congenital anomalies - Chromosomal defect                           | See below                   | -      | -                    |
|                                                                          |                                                                                                        | See below | Congenital anomalies - Congenital hypothyroidism                          | See below                   | -      | -                    |
| Major congenital anomalies - structural anomalies <sup>d</sup>           |                                                                                                        | Q00-Q89   | Congenital malformations and deformations                                 | 74, 75, 27910, 76076, 76280 | -      | -                    |
| Major congenital anomalies - Chromosomal defect <sup>d</sup>             |                                                                                                        | Q90-Q99   | Chromosomal abnormalities, not elsewhere classified (including trisomies) | 7580-7583, 7585-7589        | -      | -                    |
| Congenital                                                               |                                                                                                        | E00       | Congenital iodine-                                                        | -                           | -      | -                    |

**Metformin in pregnancy and risk of adverse long-term outcomes: register-based cohort study**

Supplementary file

| Outcome        | Outcome (definition) | ICD-10 | ICD-10 (description)                                                                              | ICD-9 <sup>a</sup> | ICPC-2 | ICPC-2 (description) |
|----------------|----------------------|--------|---------------------------------------------------------------------------------------------------|--------------------|--------|----------------------|
| anomalies -    |                      |        | deficiency syndrome                                                                               |                    |        |                      |
| Congenital     |                      | E00.1  | Congenital iodine-                                                                                | -                  | -      | -                    |
| hypothyroidism |                      |        | deficiency syndrome,<br>myxoedematous type -<br>Hypothyroid                                       |                    |        |                      |
|                |                      | E00.2  | Congenital iodine-                                                                                | -                  | -      | -                    |
|                |                      |        | deficiency syndrome,<br>mixed type                                                                |                    |        |                      |
|                |                      | E00.9  | Congenital iodine-                                                                                | -                  | -      | -                    |
|                |                      |        | deficiency hypothyroidism<br>NOS, within Congenital<br>iodine-deficiency<br>syndrome, unspecified |                    |        |                      |
|                |                      | E02    | Subclinical iodine-                                                                               | -                  | -      | -                    |
|                |                      |        | deficiency hypothyroidism                                                                         |                    |        |                      |
|                |                      | E03    | Other hypothyroidism                                                                              | -                  | -      | -                    |
|                |                      | E03.0  | Congenital hypothyroidism                                                                         | -                  | -      | -                    |
|                |                      |        | with diffuse goitre                                                                               |                    |        |                      |
|                |                      | E03.1  | Congenital hypothyroidism                                                                         | -                  | -      | -                    |

**Metformin in pregnancy and risk of adverse long-term outcomes: register-based cohort study**

Supplementary file

| Outcome        | Outcome (definition)                                        | ICD-10              | ICD-10 (description)                                             | ICD-9 <sup>a</sup> | ICPC-2 | ICPC-2 (description) |
|----------------|-------------------------------------------------------------|---------------------|------------------------------------------------------------------|--------------------|--------|----------------------|
|                |                                                             |                     | without goitre                                                   |                    |        |                      |
|                |                                                             | E03.2               | Hypothyroidism due to medicaments and other exogenous substances | -                  | -      | -                    |
|                |                                                             | E03.8               | Other specified hypothyroidism                                   | -                  | -      | -                    |
|                |                                                             | E03.80 <sup>c</sup> | Hypothyroidism caused by autoimmune thyroiditis                  | -                  |        |                      |
|                |                                                             | E03.82 <sup>c</sup> | Hypothyroidism caused by autoimmune thyroiditis                  | -                  |        |                      |
|                |                                                             | E03.89 <sup>c</sup> | Other specified hypothyroidism                                   | -                  |        |                      |
|                |                                                             | E03.9               | Hypothyroidism, unspecified                                      | -                  | -      | -                    |
| Weight         | Birth weight (g) recorded in the Medical Birth Register     | -                   | -                                                                | -                  | -      | -                    |
| Length         | Length (cm) at birth recorded in the Medical Birth Register | -                   | -                                                                | -                  | -      | -                    |
| Ponderal index | Ponderal index (kg/m <sup>3</sup> ) at birth                | -                   | -                                                                | -                  | -      | -                    |

### Metformin in pregnancy and risk of adverse long-term outcomes: register-based cohort study

Supplementary file

| Outcome            | Outcome (definition)                                                                                                                                 | ICD-10 | ICD-10 (description) | ICD-9 <sup>a</sup> | ICPC-2 | ICPC-2 (description) |
|--------------------|------------------------------------------------------------------------------------------------------------------------------------------------------|--------|----------------------|--------------------|--------|----------------------|
|                    | recorded in the Medical Birth Register                                                                                                               |        |                      |                    |        |                      |
| Head circumference | Head circumference (cm) at birth recorded in the Medical Birth Register                                                                              | -      | -                    | -                  | -      | -                    |
| LGA <sup>c</sup>   | Birth weight (g) recorded in the Medical Birth Register two standard deviations above the gestational age and sex-specific reference mean in Finland | -      | -                    | -                  | -      | -                    |
| SGA <sup>c</sup>   | Birth weight (g) recorded in the Medical Birth Register two standard deviations below the gestational age and sex-specific reference mean in Finland | -      | -                    | -                  | -      | -                    |
| Preterm birth      | Length of gestation (gestational age) less than 37 completed weeks, as recorded in the Medical Birth Register                                        | -      | -                    | -                  | -      | -                    |

**Metformin in pregnancy and risk of adverse long-term outcomes: register-based cohort study**

Supplementary file

| Outcome                | Outcome (definition)                                                                                                                                                                                                                                                                                                                                                    | ICD-10                                                                                                              | ICD-10 (description)                                                                                                                                                                                                                     | ICD-9 <sup>a</sup>              | ICPC-2                                   | ICPC-2 (description)                                         |
|------------------------|-------------------------------------------------------------------------------------------------------------------------------------------------------------------------------------------------------------------------------------------------------------------------------------------------------------------------------------------------------------------------|---------------------------------------------------------------------------------------------------------------------|------------------------------------------------------------------------------------------------------------------------------------------------------------------------------------------------------------------------------------------|---------------------------------|------------------------------------------|--------------------------------------------------------------|
| Perinatal mortality    | Death during the first week of life, recorded in the Medical Birth Register. Stillbirth is excluded from the definition, as exclusively live births are included in the study population                                                                                                                                                                                | -                                                                                                                   | -                                                                                                                                                                                                                                        | -                               | -                                        | -                                                            |
| Neonatal hypoglycaemia | At least one record of a diagnosis code for hypoglycaemia in HILMO or AvoHILMO, or plasma glucose < 2.9 mmol/l as recorded in the regional laboratory databases, up to 28 days from birth. The definition also includes neonatal hypoglycaemia, defined as plasma glucose < 1.7 mmol/l at the date of birth or plasma glucose < 2.5 mmol/l between 2-28 days from birth | E16.1<br>E16.10 <sup>c</sup><br>E16.11 <sup>c</sup><br>E16.17 <sup>c</sup><br>E16.19 <sup>c</sup><br>E16.2<br>P70.0 | Other hypoglycaemia<br>Hyperinsulinism<br>Hyperinsulinism NOS<br>Functional non-hyperinsulinaemic hypoglycaemia<br>Other specified hypoglycaemia<br>Hypoglycaemia, unspecified<br>Syndrome of infant of mother with gestational diabetes | -<br>-<br>-<br>-<br>-<br>-<br>- | T87<br>-<br>-<br>-<br>-<br>T87<br>-<br>- | Hypoglycaemia<br>-<br>-<br>-<br>-<br>Hypoglycaemia<br>-<br>- |

**Metformin in pregnancy and risk of adverse long-term outcomes: register-based cohort study**  
Supplementary file



| Outcome                 | Outcome (definition)                                                                                                                                                                                                                                                                                                                        | ICD-10 | ICD-10 (description)                    | ICD-9 <sup>a</sup> | ICPC-2 | ICPC-2 (description) |
|-------------------------|---------------------------------------------------------------------------------------------------------------------------------------------------------------------------------------------------------------------------------------------------------------------------------------------------------------------------------------------|--------|-----------------------------------------|--------------------|--------|----------------------|
|                         |                                                                                                                                                                                                                                                                                                                                             | P70.1  | Syndrome of infant of a diabetic mother | -                  | -      | -                    |
|                         |                                                                                                                                                                                                                                                                                                                                             | P70.3  | Iatrogenic neonatal hypoglycaemia       | -                  | -      | -                    |
|                         |                                                                                                                                                                                                                                                                                                                                             | P70.4  | Other neonatal hypoglycaemia            | -                  | -      | -                    |
| Neonatal hyperglycaemia | At least one record of a diagnosis code for hyperglycaemia in HILMO or AvoHILMO, or fasting plasma glucose $\geq 7.0$ mmol/l, or 2h plasma during OGTT $\geq 11.1$ mmol/l, or HbA1c $\geq 48$ mmol/mol (or $\geq 6.5\%$ ), or plasma glucose $\geq 11.1$ mmol/l, as recorded in the regional laboratory databases, up to 28 days from birth | R73    | Elevated blood glucose level            | -                  | -      | -                    |

---

**Secondary (binary and continuous) outcomes B - Long-term growth-related effects:**

---

**Metformin in pregnancy and risk of adverse long-term outcomes: register-based cohort study**

Supplementary file

| Outcome                                                                                                                                        | Outcome (definition)                                                                                                                                                 | ICD-10 | ICD-10 (description) | ICD-9 <sup>a</sup> | ICPC-2 | ICPC-2 (description) |
|------------------------------------------------------------------------------------------------------------------------------------------------|----------------------------------------------------------------------------------------------------------------------------------------------------------------------|--------|----------------------|--------------------|--------|----------------------|
| Data collection from age one week until the date of the first occurring event of death, emigration, or end of study period (December 31, 2016) |                                                                                                                                                                      |        |                      |                    |        |                      |
| Overweight                                                                                                                                     | BMI (kg/m <sup>2</sup> ) recorded in AvoHILMO above the threshold for overweight according to the Finnish growth references considering the sex and age of the child | -      | -                    | -                  | -      | -                    |
| Ponderal index                                                                                                                                 | Ponderal index (kg/m <sup>3</sup> ) recorded in AvoHILMO                                                                                                             | -      | -                    | -                  | -      | -                    |
| High Ponderal index                                                                                                                            | Ponderal index (kg/m <sup>3</sup> ) recorded in AvoHILMO > 10th percentile considering the age and sex of the child                                                  | -      | -                    | -                  | -      | -                    |
| BMI                                                                                                                                            | BMI (kg/m <sup>2</sup> ) recorded in AvoHILMO                                                                                                                        | -      | -                    | -                  | -      | -                    |

Abbreviations: ICD-9, International Classification of Diseases, 9th revision; ICD-10, International Classification of Diseases, 10th revision; ICPC-2, International Classification of Primary Care, 2nd revision; HILMO, Care Register for Health Care Visits; AvoHILMO, Register of Primary Health Care Visits; BMI, body mass index; OGTT, oral glucose tolerance test; PCOS, polycystic ovary syndrome; LGA, large for gestational age; SGA, small for gestational age

<sup>a</sup> ICD-9 was used only for anomalies in the Register of Congenital Malformations

<sup>b</sup> Saari A, Sankilampi U, Hannila M-L, et al. New Finnish growth references for children and adolescents aged 0 to 20 years: Length/height-for-age, weight-for-length/height, and body mass index-for-age. *Ann Med* 2011;43:235–48. doi:10.3109/07853890.2010.515603

<sup>c</sup> Finnish adaptation of the ICD-10 code

### Metformin in pregnancy and risk of adverse long-term outcomes: register-based cohort study

Supplementary file

<sup>d</sup> Major congenital anomalies were based on ICD-9 and ICD-10 diagnoses from the Register of Congenital Malformations. The site-specific sub-categories were further categorised in accordance with EUROCAT guide v1.4. Minor congenital anomalies were excluded in accordance with EUROCAT guide v1.4

<sup>e</sup> Sankilampi U, Hannila M-L, Saari A, et al. New population-based references for birth weight, length, and head circumference in singletons and twins from 23 to 43 gestation weeks. *Ann Med* 2013;45:446–54. doi:10.3109/07853890.2013.803739

---

**Metformin in pregnancy and risk of adverse long-term outcomes: register-based cohort study**

Supplementary file

**Supplemental Table S4. Definitions of covariates (maternal diagnoses)**

| <b>Covariates</b>                                 | <b>ICD-10</b> | <b>ICD-10 (description)</b>                   | <b>ICPC-2</b> | <b>ICPC-2 (description)</b>                   |
|---------------------------------------------------|---------------|-----------------------------------------------|---------------|-----------------------------------------------|
| Gestational diabetes mellitus                     | O24.4         | Diabetes mellitus arising in pregnancy        | W85           | Gestational diabetes                          |
|                                                   | O24.9         | Diabetes mellitus in pregnancy, unspecified   | -             | -                                             |
| PCOS                                              | E28.2         | Polycystic ovarian syndrome                   | T99           | Endocrine/metabolic/nutritional disease other |
| Type 1 diabetes mellitus                          | E10           | Type 1 diabetes mellitus                      | T89           | Diabetes insulin dependent                    |
|                                                   | O24.0         | Pre-existing type 1 diabetes mellitus         | -             | -                                             |
| Preeclampsia                                      | O14           | Pre-eclampsia                                 | W81           | Toxaemia of pregnancy                         |
| Type 2 diabetes mellitus                          | E11           | Type 2 diabetes mellitus                      | T90           | Diabetes non-insulin dependent                |
|                                                   | O24.1         | Pre-existing type 2 diabetes mellitus         | -             | -                                             |
| Essential hypertension                            | I10           | Essential (primary) hypertension              | K86           | Hypertension uncomplicated                    |
| Gestational hypertension                          | O13           | Gestational [pregnancy-induced] hypertension; | W81           | Toxaemia of pregnancy                         |
|                                                   |               | Mild preeclampsia                             |               |                                               |
| Persistence of diabetes in the mother after birth | E10-E14       | Diabetes mellitus, excluding type 1 diabetes  | F83           | Retinopathy                                   |
|                                                   | excluding E11 | mellitus                                      | T90           | Diabetes non-insulin dependent                |

Abbreviations: ICD-10, International Classification of Diseases, 10th revision; ICPC-2, International Classification of Primary Care, 2nd revision; PCOS, polycystic ovary syndrome

**Metformin in pregnancy and risk of adverse long-term outcomes: register-based cohort study**  
Supplementary file

### **Supplemental Methods 1. Calculation of incidence rates**

Incidence rates (IRs) with 95% confidence intervals (CIs) were estimated according to age period, using categories 1 week-2 years, 3-5 years, 6-8 years, 9-11 years, and age 12 years or older. Different analytic setups were used to calculate IRs for outcomes considered permanent (diabetes, PCOS, and challenges in motor-social development) and temporary (obesity, hypoglycaemia, hyperglycaemia, and hypertension). For permanent outcomes, children were censored at the date of the first event during follow-up period (and contributed person-time and events only to age periods up to that point). For temporary outcomes, children contributed to all age periods for the entire duration of follow-up; the first occurrence of an outcome event within each age period was counted, regardless of previous events in earlier age periods. At the date of an event, follow-up was censored for the remaining duration within the specific age period. A small proportion of children had missing information on the estimated last menstrual period (LMP) and gestational age in the Medical Birth Registry; in this case, the date of LMP was imputed based on date of birth and the average gestational age observed in the data. For covariates with missing information, a separate missing category was added and used in the analysis.

## **Supplemental Methods 2. Description of the subcohort for maternal gestational diabetes**

In additional analysis, a subcohort including children to mothers with gestational diabetes was created. Children born to mothers who were dispensed metformin or insulin after the gestational week 11 were included. All children born to mothers with dispensations of metformin or insulin before gestational week 12 were excluded, as it was thought likely that the drug was used for some other indication, such as PCOS or type 2 diabetes. Additionally, children of mothers who had a diagnosis of type 2 diabetes or PCOS recorded by the end of pregnancy were excluded, if they did not have a diagnosis of gestational diabetes.

Children in this subcohort were classified into three exposure groups (i.e., metformin, insulin, and combination treatment), consistent with the main analyses.

The PS-weighted model was re-fitted for all primary outcomes with the additional covariate of the categorical version of the variable gestational week of initiating pharmacological antidiabetic treatment and its interaction terms with cohort indicator. The following categories were used for gestational week of initiating the pharmacological antidiabetic treatment: 12–19, 20–23, 24–26, 27–30, and >30 weeks. The results of the sensitivity analyses are presented in the results section.

**Supplemental Table S5. Baseline characteristics of children exposed to metformin, combination treatment, and insulin in the subcohort for maternal gestational diabetes.**

| <b>Characteristic</b>                                             | <b>Metformin<br/>(n=2361)</b> | <b>Combination treatment<br/>(n=577)</b> | <b>Insulin<br/>(n=4865)</b> |
|-------------------------------------------------------------------|-------------------------------|------------------------------------------|-----------------------------|
| <b>Gestational age at birth (weeks), median (IQR)<sup>a</sup></b> | 39.3<br>(38.4-40.0)           | 38.9<br>(38.1-39.7)                      | 39.1<br>(38.4-40.0)         |
| <b>Sex, n (%)</b>                                                 |                               |                                          |                             |
| Female                                                            | 1133 (48.0)                   | 274 (47.5)                               | 2297 (47.2)                 |
| Male                                                              | 1228 (52.0)                   | 303 (52.5)                               | 2568 (52.8)                 |
| <b>Year of birth, n (%)</b>                                       |                               |                                          |                             |
| 2004-2008                                                         | 152 (6.4)                     | 14 (2.4)                                 | 1380 (28.4)                 |
| 2009-2013                                                         | 939 (39.8)                    | 205 (35.5)                               | 2154 (44.3)                 |
| 2014-2016                                                         | 1270 (53.8)                   | 358 (62.1)                               | 1331 (27.4)                 |
| <b>Child's region of residency at birth, n (%)<sup>b</sup></b>    |                               |                                          |                             |
| Helsinki                                                          | 634 (26.9)                    | 176 (30.5)                               | 822 (16.9)                  |
| Pirkanmaa                                                         | 274 (11.6)                    | 125 (21.7)                               | 992 (20.4)                  |
| Varsinais-Soumi                                                   | 814 (34.5)                    | 57 (9.9)                                 | 126 (2.6)                   |
| Other (18 regions)                                                | 639 (27.1)                    | 219 (38.0)                               | 2925 (60.1)                 |
| <b>Type of delivery, n (%)</b>                                    |                               |                                          |                             |
| Vaginal birth                                                     | 1787 (75.7)                   | 399 (69.2)                               | 3627 (74.6)                 |

**Metformin in pregnancy and risk of adverse long-term outcomes: register-based cohort study**

Supplementary file

| <b>Characteristic</b>                                                          | <b>Metformin<br/>(n=2361)</b> | <b>Combination treatment<br/>(n=577)</b> | <b>Insulin<br/>(n=4865)</b> |
|--------------------------------------------------------------------------------|-------------------------------|------------------------------------------|-----------------------------|
| Caesarean section                                                              | 574 (24.3)                    | 178 (30.9)                               | 1237 (25.4)                 |
| Missing                                                                        | 0 (0.0)                       | 0 (0.0)                                  | 1 (0.0)                     |
| <b>Maternal age at delivery, median (IQR)</b>                                  | 32.0<br>(29.0, 36.0)          | 34.0<br>(30.0, 37.0)                     | 33.0<br>(29.0, 36.0)        |
| <b>Maternal pre-pregnancy BMI (kg/m<sup>2</sup>), median (IQR)<sup>c</sup></b> | 30.5<br>(26.0-35.4)           | 33.8<br>(28.8-38.3)                      | 30.0<br>(26.1-34.7)         |
| <b>Maternal parity, n (%)</b>                                                  |                               |                                          |                             |
| Nulliparous                                                                    | 762 (32.3)                    | 136 (23.6)                               | 1390 (28.6)                 |
| Parity 1-2                                                                     | 1262 (53.5)                   | 332 (57.5)                               | 2658 (54.6)                 |
| Parity ≥3                                                                      | 337 (14.3)                    | 109 (18.9)                               | 815 (16.8)                  |
| Missing                                                                        | 0 (0.0)                       | 0 (0.0)                                  | 2 (0.0)                     |
| <b>Maternal educational level during pregnancy, n (%)</b>                      |                               |                                          |                             |
| Higher education                                                               | 865 (36.6)                    | 204 (35.4)                               | 1866 (38.4)                 |
| High school                                                                    | 1010 (42.8)                   | 281 (48.7)                               | 2247 (46.2)                 |
| Missing                                                                        | 486 (20.6)                    | 92 (15.9)                                | 752 (15.5)                  |
| <b>Maternal smoking during pregnancy, n (%)</b>                                |                               |                                          |                             |
| Yes                                                                            | 450 (19.1)                    | 99 (17.2)                                | 880 (18.1)                  |

---

**Metformin in pregnancy and risk of adverse long-term outcomes: register-based cohort study**

Supplementary file



| <b>Characteristic</b>                                                              | <b>Metformin<br/>(n=2361)</b> | <b>Combination treatment<br/>(n=577)</b> | <b>Insulin<br/>(n=4865)</b> |
|------------------------------------------------------------------------------------|-------------------------------|------------------------------------------|-----------------------------|
| No                                                                                 | 1880 (79.6)                   | 463 (80.2)                               | 3819 (78.5)                 |
| Missing                                                                            | 31 (1.3)                      | 15 (2.6)                                 | 166 (3.4)                   |
| <b>Maternal comorbidities before pregnancy</b>                                     |                               |                                          |                             |
| <b>Pre-gestational type 2 diabetes, n (%)</b>                                      | 0                             | 0                                        | 0                           |
| <b>PCOS, n (%)</b>                                                                 | 71 (3.0)                      | 14 (2.4)                                 | 108 (2.2)                   |
| <b>Obesity at the beginning of pregnancy, n (%)</b>                                |                               |                                          |                             |
| Yes                                                                                | 1242 (52.6)                   | 399 (69.2)                               | 2376 (48.8)                 |
| No                                                                                 | 1092 (46.3)                   | 172 (29.8)                               | 2392 (49.2)                 |
| Missing                                                                            | 27 (1.1)                      | 6 (1.0)                                  | 97 (2.0)                    |
| <b>Toxemia in pregnancy, n (%)</b>                                                 | 313 (13.3)                    | 116 (20.1)                               | 759 (15.6)                  |
| <b>Gestational diabetes in pregnancy, n (%)</b>                                    | 2350 (99.5)                   | 577 (100.0)                              | 4860 (99.9)                 |
| <b>Gestational week of maternal gestational diabetes, median (IQR)<sup>d</sup></b> | 24.3<br>(15.1-27.4)           | 16.3<br>(13.7-21.3)                      | 25.7<br>(17.0-29.3)         |
| <b>Essential hypertension in pregnancy, n (%)</b>                                  | 33 (1.4)                      | 19 (3.3)                                 | 64 (1.3)                    |
| <b>Gestational hypertension in pregnancy, n (%)</b>                                | 152 (6.4)                     | 66 (11.4)                                | 408 (8.4)                   |
| <b>Preeclampsia in pregnancy, n (%)</b>                                            | 91 (3.9)                      | 29 (5.0)                                 | 187 (3.8)                   |
| <b>Other characteristics</b>                                                       |                               |                                          |                             |

---

**Metformin in pregnancy and risk of adverse long-term outcomes: register-based cohort study**

Supplementary file

| <b>Characteristic</b>                                                                                                | <b>Metformin<br/>(n=2361)</b> | <b>Combination treatment<br/>(n=577)</b> | <b>Insulin<br/>(n=4865)</b> |
|----------------------------------------------------------------------------------------------------------------------|-------------------------------|------------------------------------------|-----------------------------|
| <b>Dispensation of antidiabetic medications within 3 months before the beginning of pregnancy, n (%)<sup>e</sup></b> |                               |                                          |                             |
| No pre-pregnancy pharmacological antidiabetic treatment                                                              | 2312 (97.9)                   | 571 (99.0)                               | 4828 (99.2)                 |
| Pre-pregnancy metformin only                                                                                         | 49 (2.1)                      | 6 (1.0)                                  | 34 (0.7)                    |
| Other                                                                                                                | 3 (0.0)                       | 0 (0.0)                                  | 3 (0.1)                     |
| <b>Gestational week of initiating the pharmacological antidiabetic treatment</b>                                     |                               |                                          |                             |
| <b>Gestational week of initiating the pharmacological antidiabetic treatment, median (IQR)</b>                       | 30.7<br>(26.4-33.3)           | 22.9<br>(19.0-28.1)                      | 31.4<br>(27.1-34.0)         |
| <b>Persistence of diabetes in the mother after birth, n (%)</b>                                                      |                               |                                          |                             |
| Yes                                                                                                                  | 14 (0.6)                      | 18 (3.1)                                 | 43 (0.9)                    |
| No                                                                                                                   | 2347 (99.4)                   | 559 (96.9)                               | 4822 (99.1)                 |
| <b>Dispensed cumulative dose of metformin during pregnancy (DDD)</b>                                                 |                               |                                          |                             |
| <b>Dispensed cumulative dose of metformin during pregnancy (DDD), median (IQR)</b>                                   | 50.0<br>(25.0-75.0)           | 75.0<br>(50.0-120.0)                     | 0.0<br>(0.0-0.0)            |

Abbreviations: BMI, body mass index; IQR, interquartile range; PCOS, polycystic ovary syndrome

<sup>a</sup> Information missing for 3 children in the insulin group (0.06%).

<sup>b</sup> The three hospital regions with the largest total number of study subjects are presented; counts from the other 18 regions are pooled

<sup>c</sup> Information missing for 27 children in the metformin group (1.14%), 6 children in the combination group (1.04%), and 97 children in the insulin group (1.99%).

### **Metformin in pregnancy and risk of adverse long-term outcomes: register-based cohort study**

Supplementary file

---

| <b>Characteristic</b> | <b>Metformin</b> | <b>Combination treatment</b> | <b>Insulin</b> |
|-----------------------|------------------|------------------------------|----------------|
|-----------------------|------------------|------------------------------|----------------|

---

|  |                 |                |                 |
|--|-----------------|----------------|-----------------|
|  | <b>(n=2361)</b> | <b>(n=577)</b> | <b>(n=4865)</b> |
|--|-----------------|----------------|-----------------|

---

<sup>d</sup> Information missing for 16 children in the metformin group (0.68%), 1 child in the combination group (0.17%), and 39 children in the insulin group (0.80%).

<sup>e</sup> Subject counts for two most frequent categories are presented. Counts for other six combinations of pre-pregnancy use of metformin, insulin, and other antidiabetic medications than metformin and insulin, are pooled

---

**Metformin in pregnancy and risk of adverse long-term outcomes: register-based cohort study**

Supplementary file

**Supplemental Table S6. Association between exposure to metformin in pregnancy (compared to exposure to only insulin) and risk of obesity, hypoglycaemia, hyperglycaemia, diabetes, hypertension, PCOS, and challenges in motor-social development in the subcohort for maternal gestational diabetes**

| Outcome <sup>a</sup>                   | IPTW-weighted HR (95% CI) <sup>b,c</sup> |                                   |
|----------------------------------------|------------------------------------------|-----------------------------------|
|                                        | Metformin vs. Insulin                    | Combination treatment vs. Insulin |
| Obesity                                | 1.52<br>(0.93-2.48)                      | 1.78<br>(0.53-5.94)               |
| Hypoglycaemia                          | 0.76<br>(0.37-1.57)                      | 4.98<br>(1.28-19.35)              |
| Hyperglycaemia                         | 1.66<br>(0.63-4.40)                      | Not estimable <sup>d</sup>        |
| Diabetes mellitus                      | 1.19<br>(0.30-4.79)                      | Not estimable <sup>d</sup>        |
| Challenges in motor-social development | 1.07<br>(0.81-1.42)                      | 1.79<br>(0.55-5.87)               |

Abbreviations: CI, confidence interval; HR, hazard ratio; IPTW, inverse probability of treatment weighting; PCOS, polycystic ovary syndrome

<sup>a</sup> No events of the primary long-term outcomes hypertension and PCOS were observed in the metformin or combination treatment groups

<sup>b</sup> Metformin and combination treatment were analysed separately, in pairwise comparisons with insulin (reference in all analyses)

<sup>c</sup> The subcohort for maternal gestational diabetes consisted of children of mothers with gestational diabetes who were analysed to study the effect of the timing of metformin/insulin initiation during pregnancy

<sup>d</sup> The effect of exposure could not be estimated (model could not be fitted, or the estimate did not converge)

**Metformin in pregnancy and risk of adverse long-term outcomes: register-based cohort study**  
Supplementary file

**Supplemental Table S7. Association between exposure to metformin in pregnancy and risk of obesity, hypoglycaemia, hyperglycaemia, diabetes, hypertension, PCOS, and challenges in motor-social development, requiring a least two prescriptions of the study drugs**

| Outcome <sup>a</sup>                   | IPTW-weighted HR (95% CI) <sup>b</sup> |                                   |
|----------------------------------------|----------------------------------------|-----------------------------------|
|                                        | Metformin vs. Insulin                  | Combination treatment vs. Insulin |
| Obesity                                | 0.77<br>(0.52-1.16)                    | 0.89<br>(0.38-2.10)               |
| Hypoglycaemia                          | 1.34<br>(0.56-3.24)                    | 1.62<br>(0.66-3.99)               |
| Hyperglycaemia                         | 1.54<br>(0.71-3.33)                    | 1.97<br>(0.36-10.87)              |
| Diabetes mellitus                      | 3.15<br>(0.75-13.27)                   | Not estimable <sup>c</sup>        |
| Challenges in motor-social development | 1.22<br>(0.94-1.58)                    | 2.09<br>(1.21-3.61)               |

Abbreviations: CI, confidence interval; HR, hazard ratio; IPTW, inverse probability of treatment weighting; PCOS, polycystic ovary syndrome

<sup>a</sup> No events of the primary long-term outcomes hypertension and PCOS were observed in the metformin or combination treatment groups

<sup>b</sup> Metformin and combination treatment were analysed separately, in pairwise comparisons with insulin (reference in all analyses)

<sup>c</sup> The effect of exposure could not be estimated (model could not be fitted, or the estimate did not converge).

---

**Metformin in pregnancy and risk of adverse long-term outcomes: register-based cohort study**  
Supplementary file
